# Supplementary material
Source: publisher figshare collection journal article supplement (https://frontiersin.figshare.com/ndownloader/files/24688271)
Supplement: Supplementary file [file 24688271]

## Supplementary Material

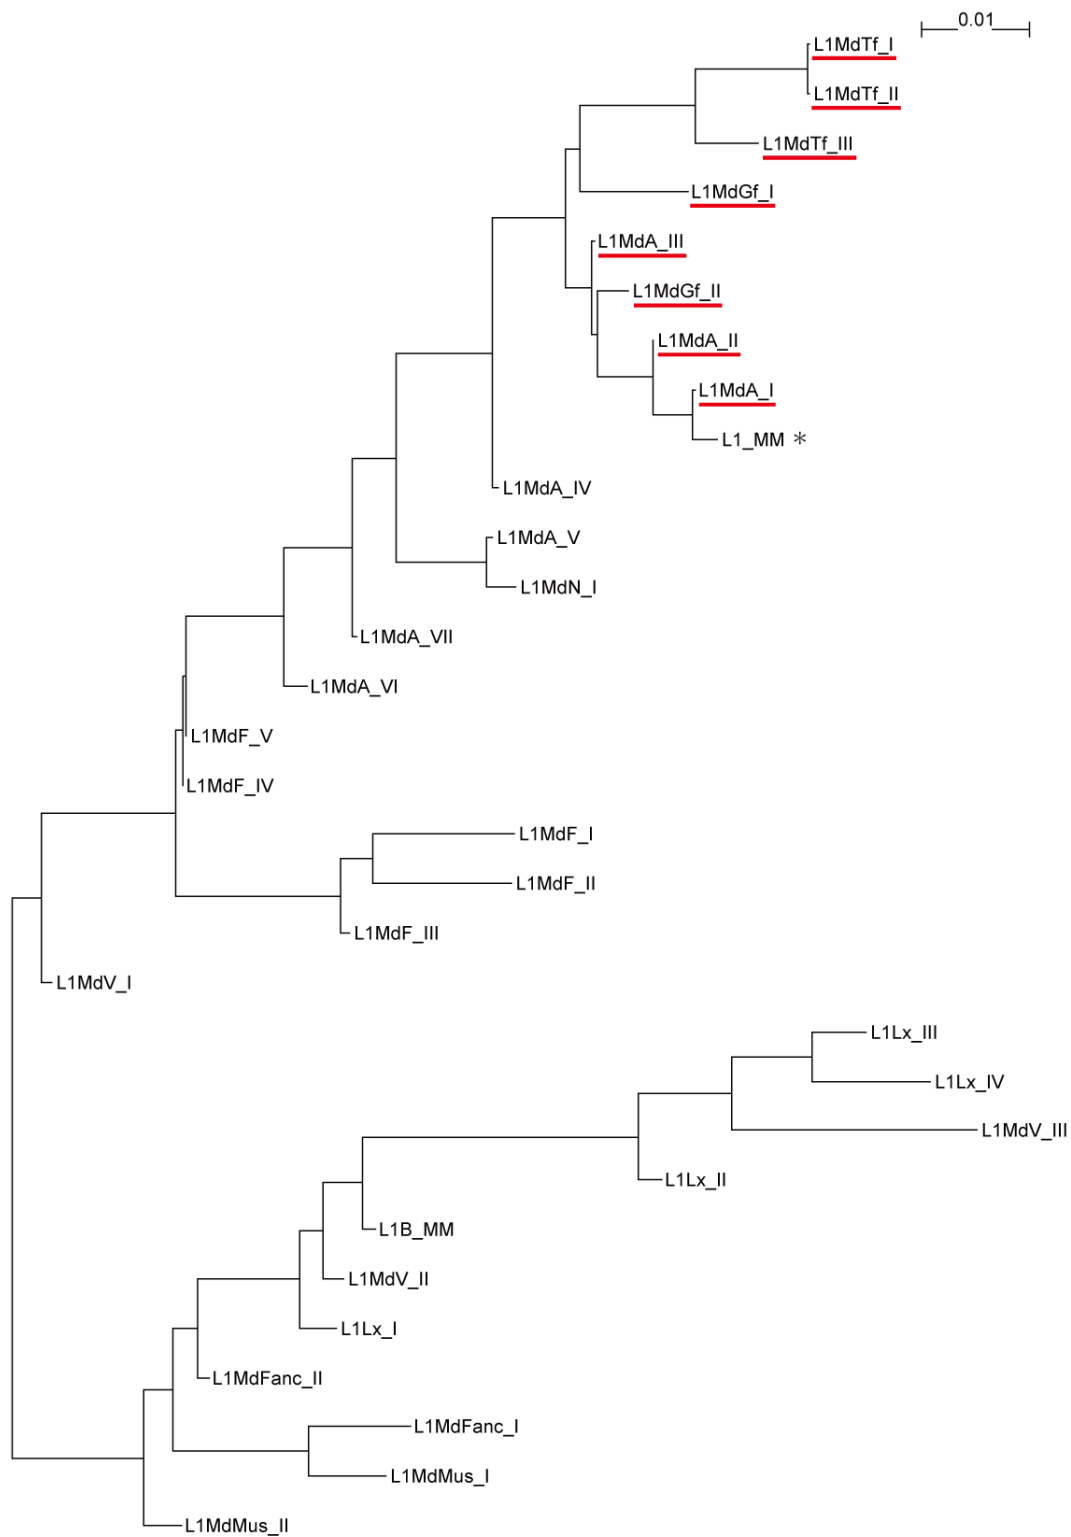

**Figure S1.** Dendritic tree of mouse L1 subfamily based on ORF2. Red underlines indicate subfamilies retaining retrotransposition activity. \* is an ancestor LINE-1 sequence predicted from the confirmed LINE-1 (Shehee et al., 1987).

(A)

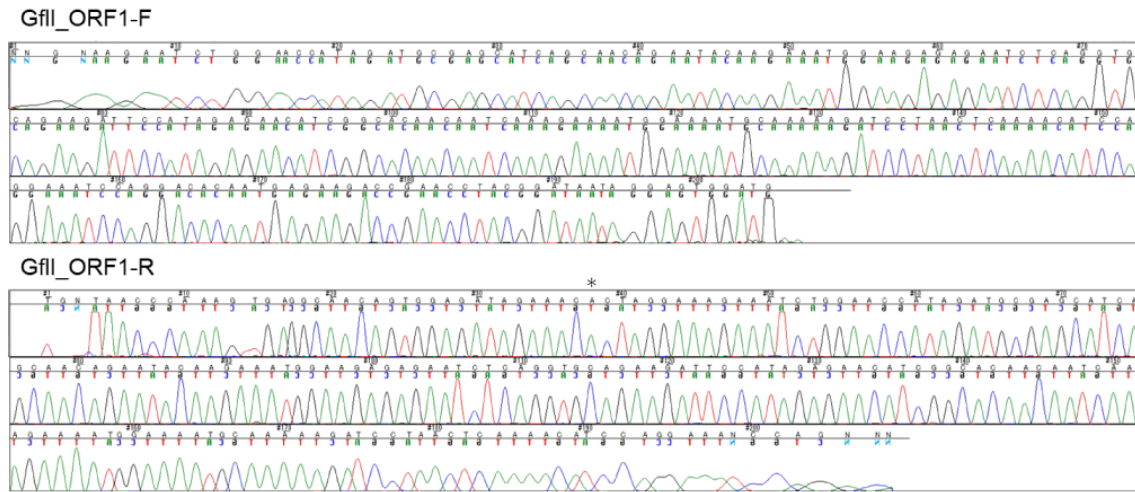

(B)

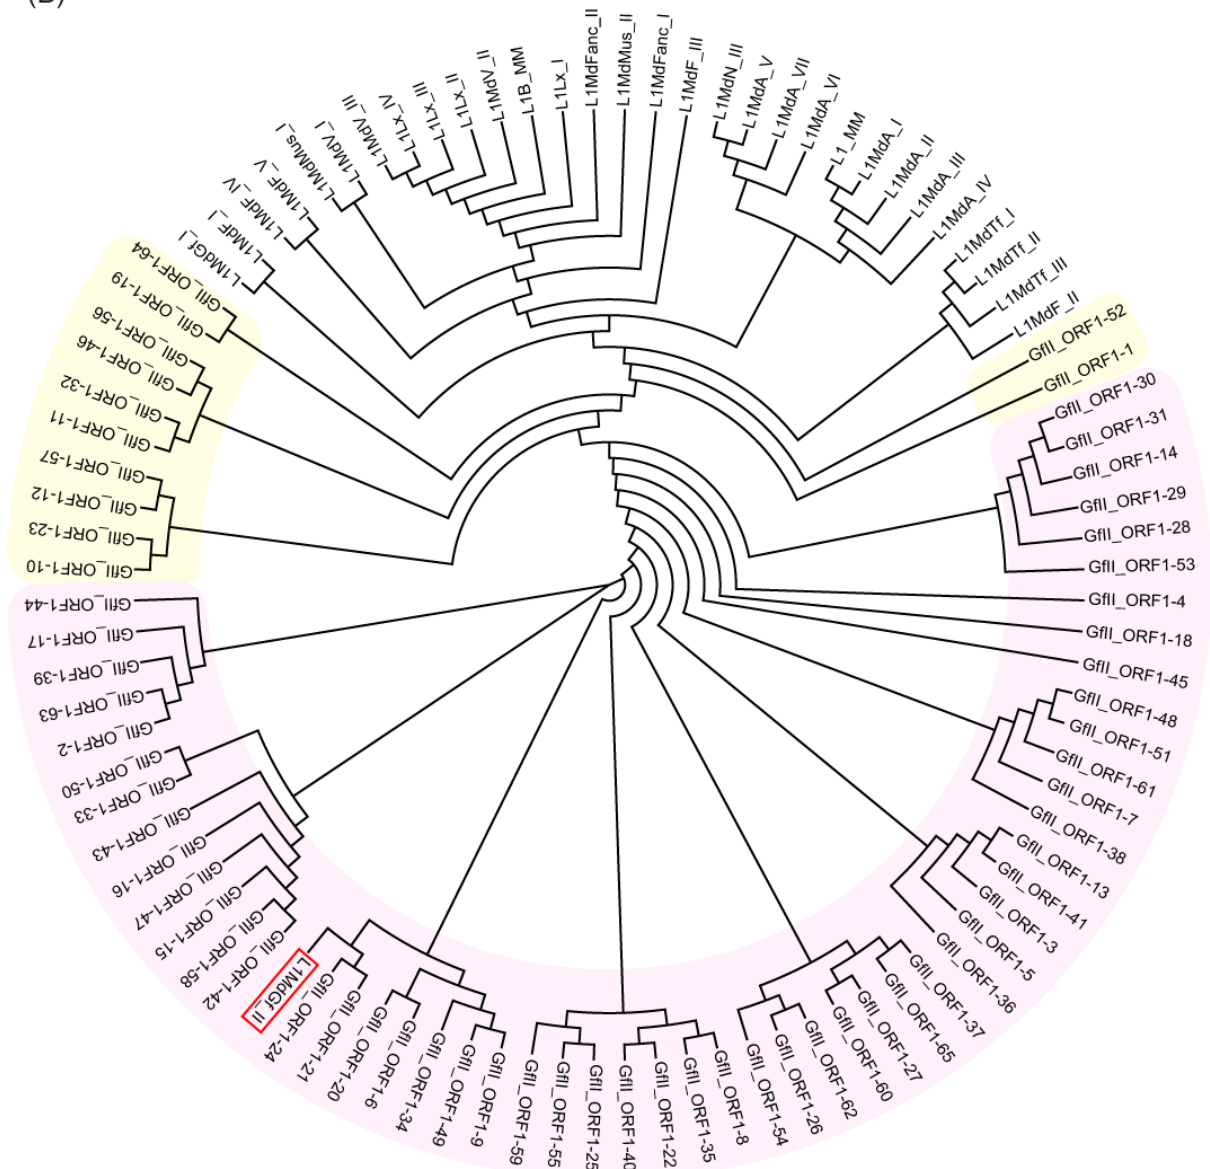

**Figure S2.** Sequencing analysis of the PCR products amplified with the GfII\_ORF1 primer pair. (A) Results of direct sequencing of PCR products. \* is the sequence specific for GfII. (B) Dendrogram of 65 sequences derived from single colonies and 31 mouse LINE-1 consensus sequences. Amplicons of the GfII ORF1 are highlighted in pink. Clones that contained GfII-specific sequences are highlighted in yellow. The consensus sequence for GfII is shown in the red rectangle.

# (A) m5UTR

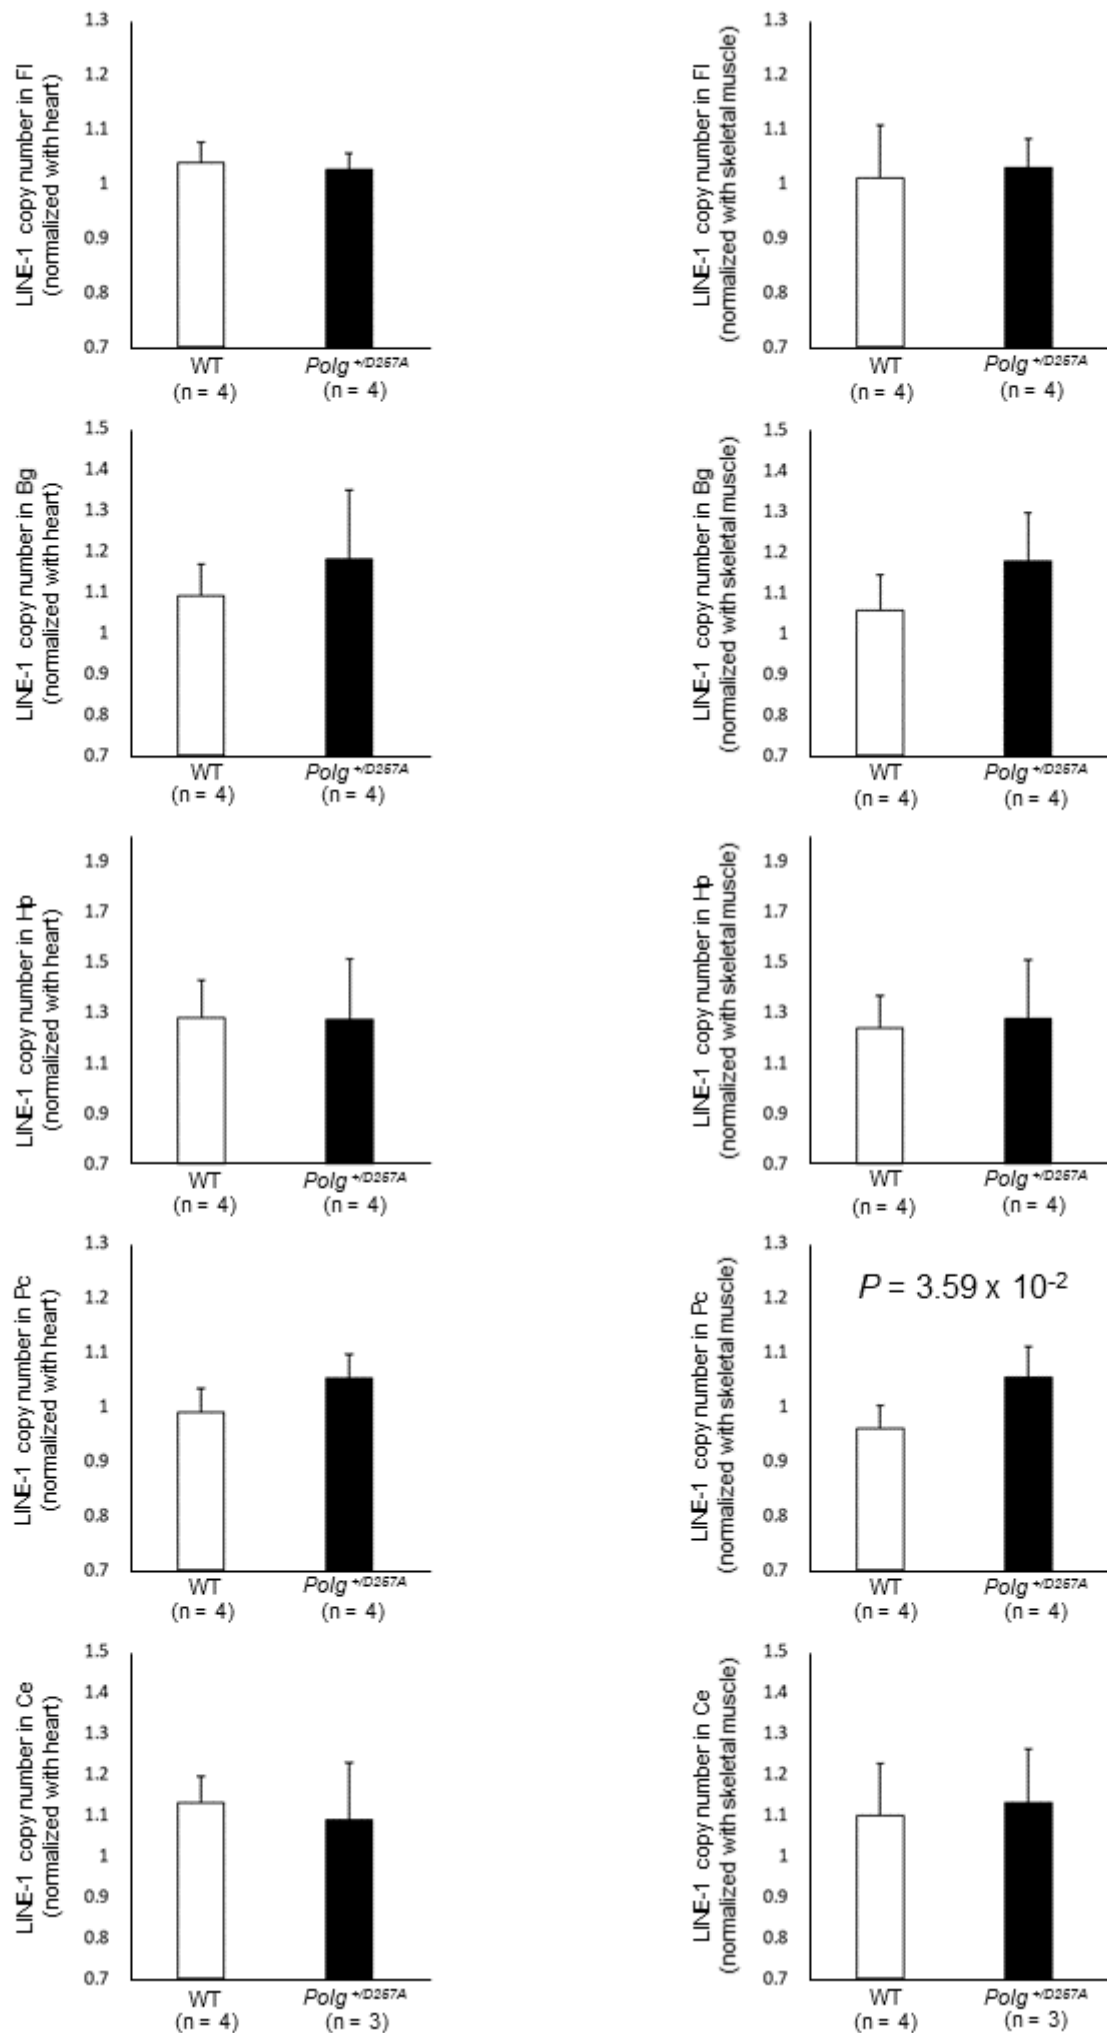

## (B) mORF1

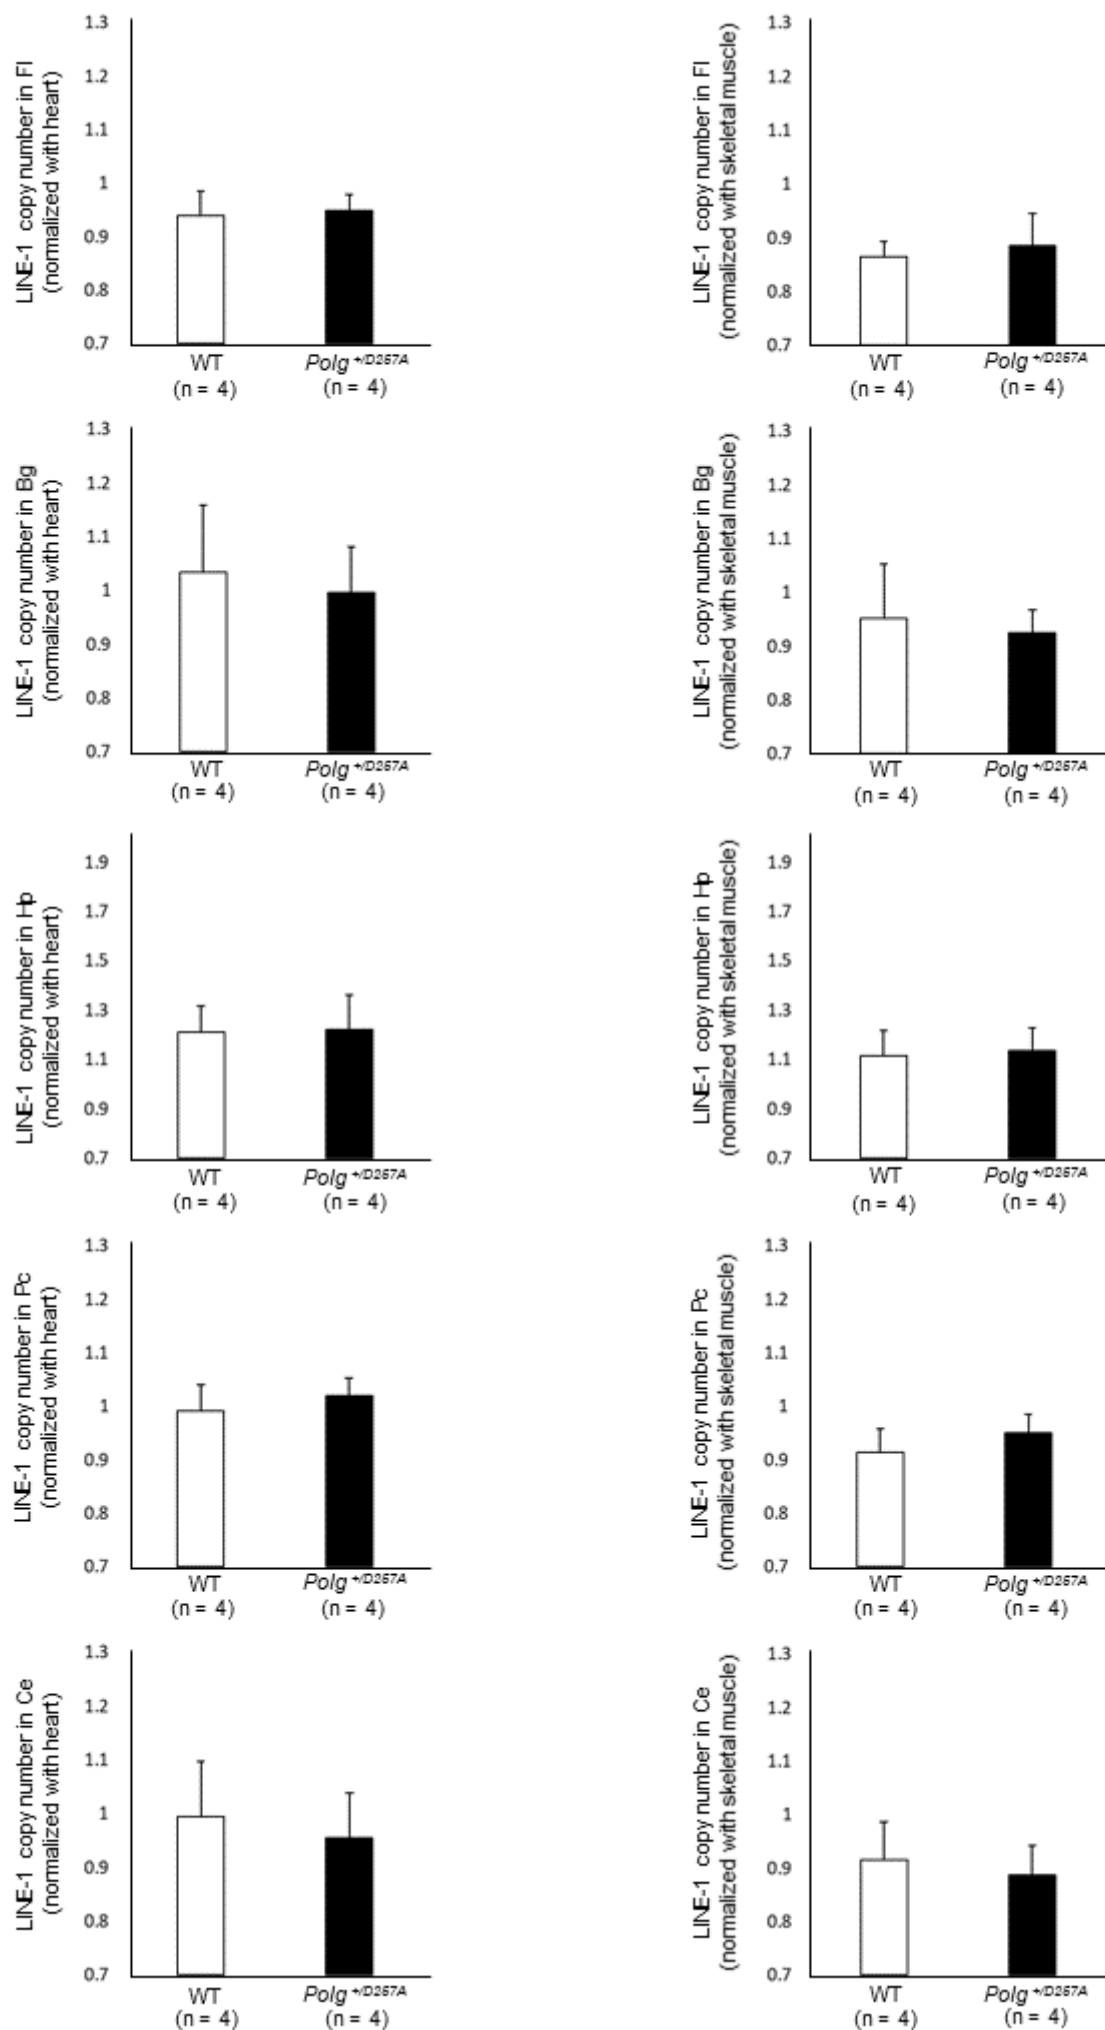

# (C) mORF2

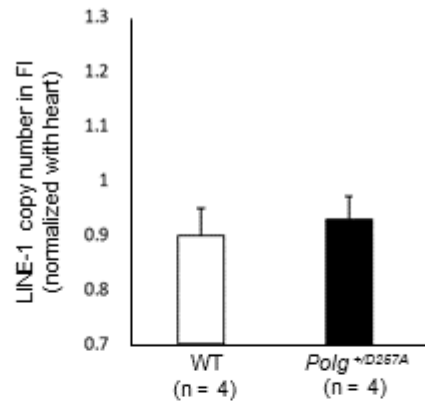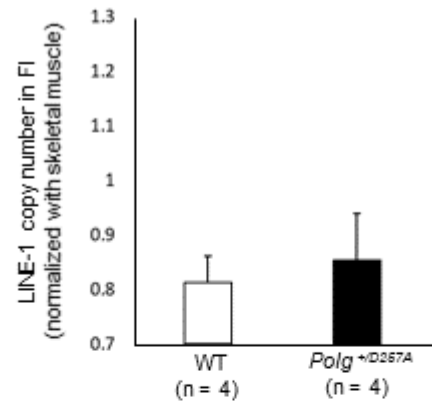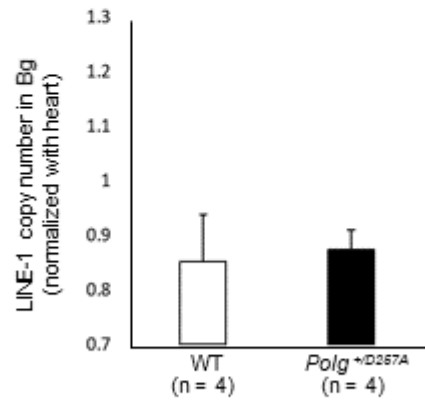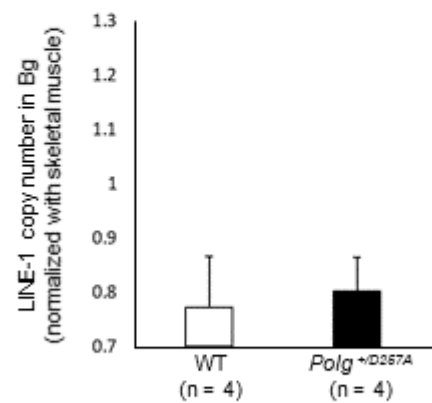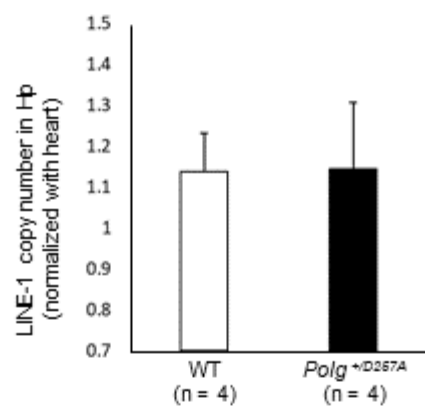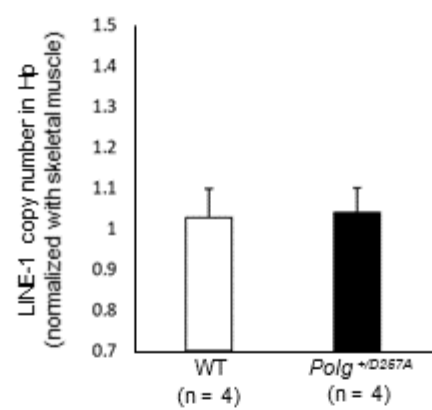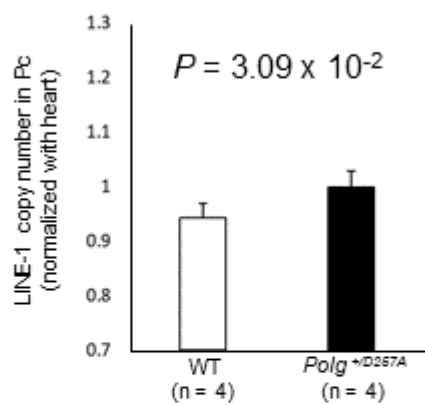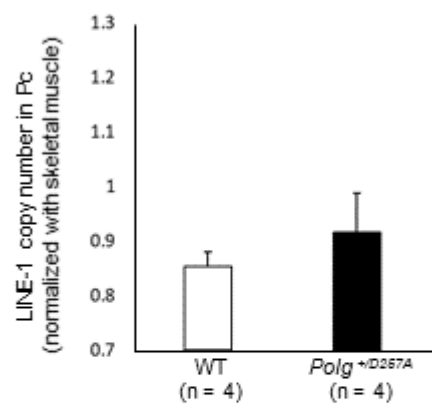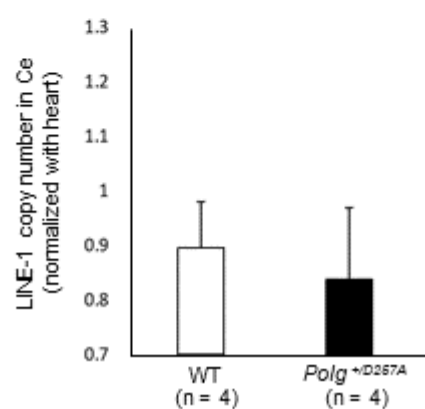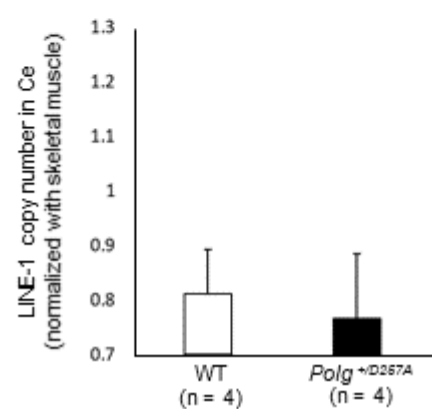

# (D) A\_ORF1

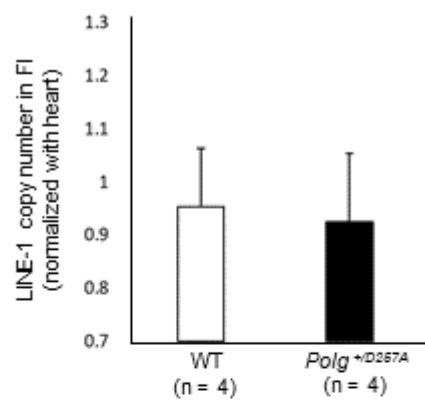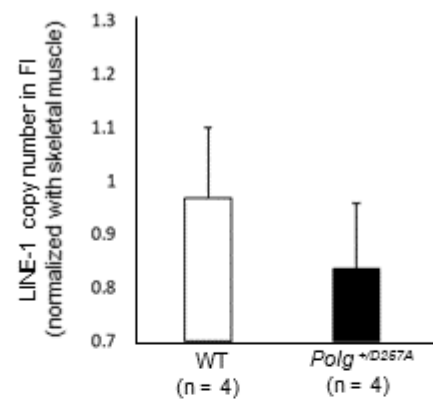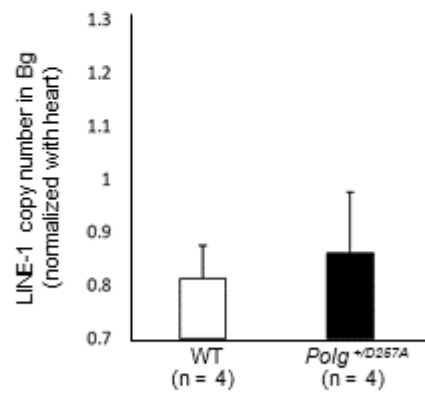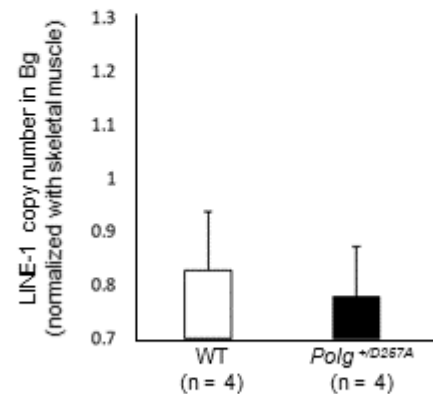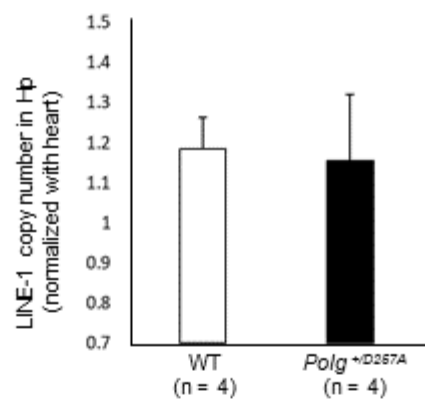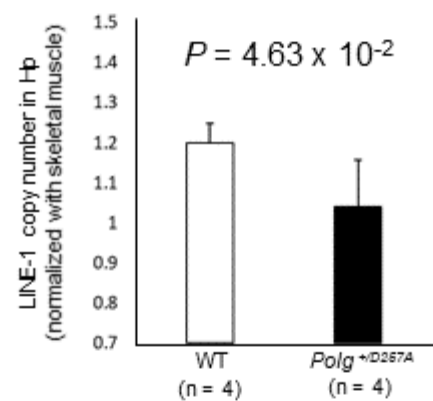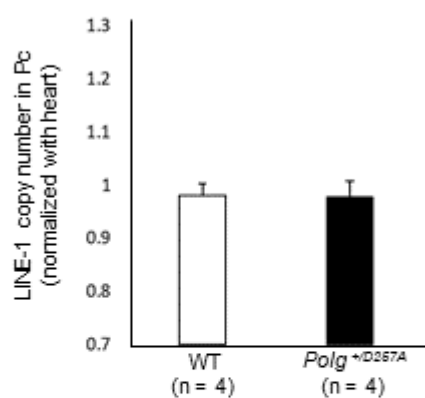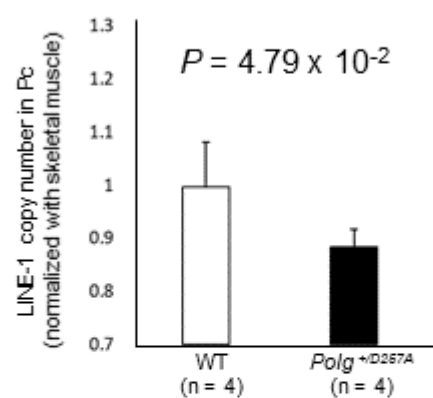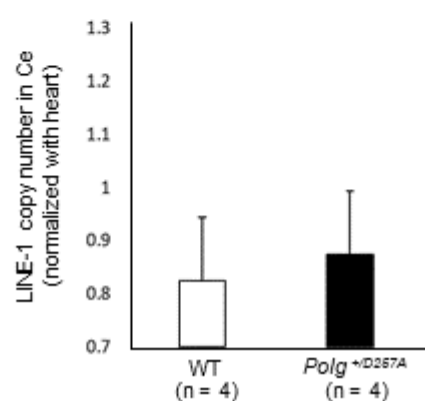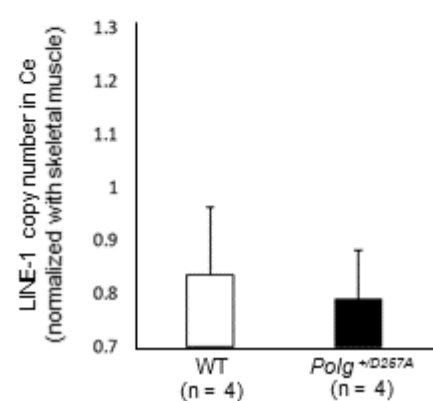

# (E) A\_ORF2\_1

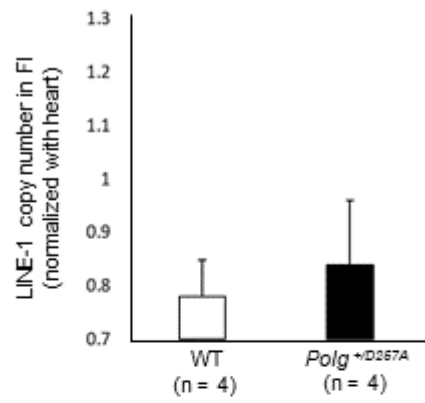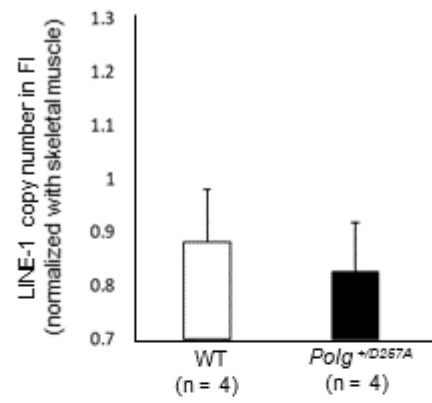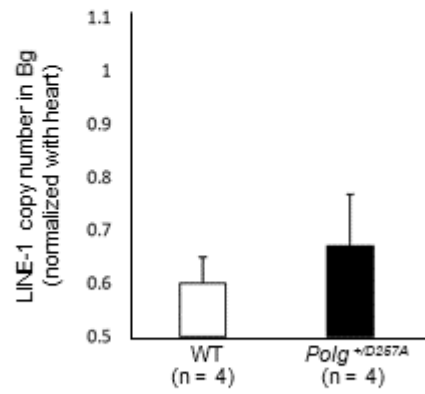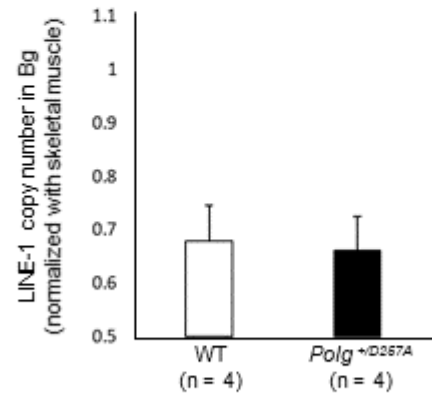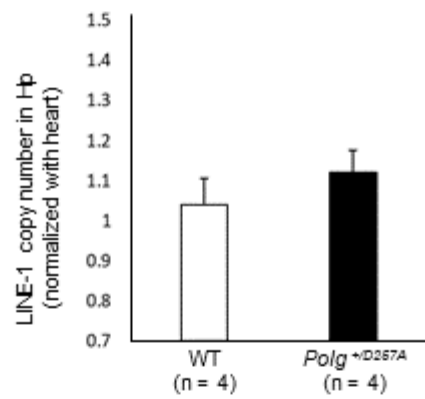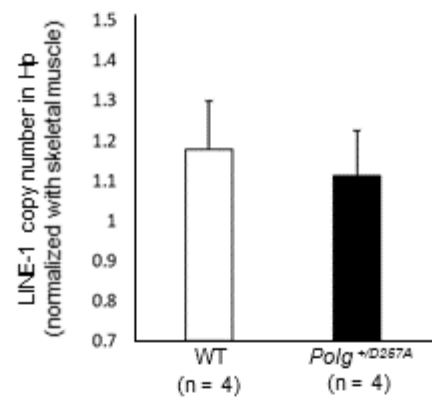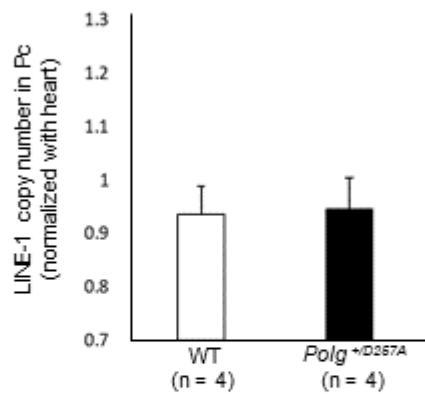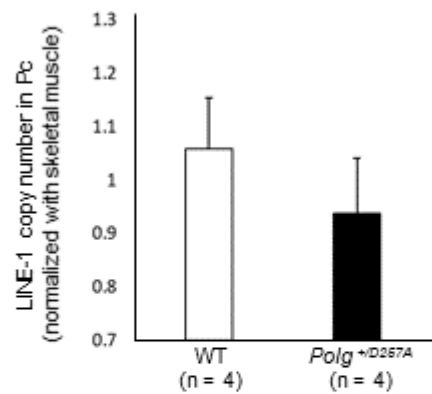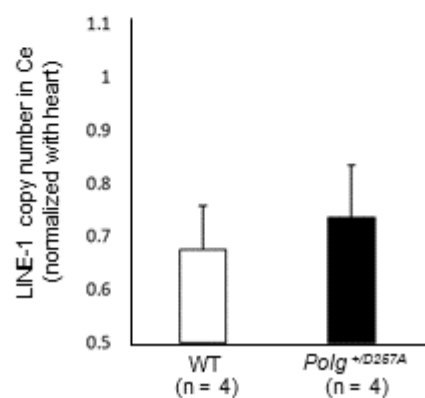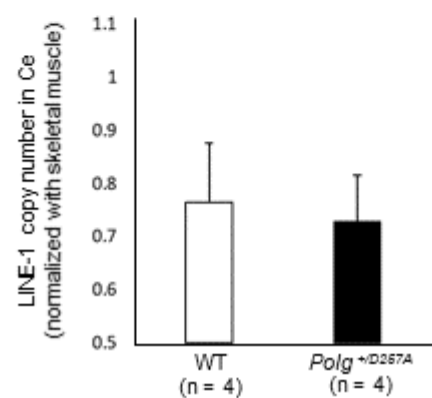

## (F) A\_ORF2\_2

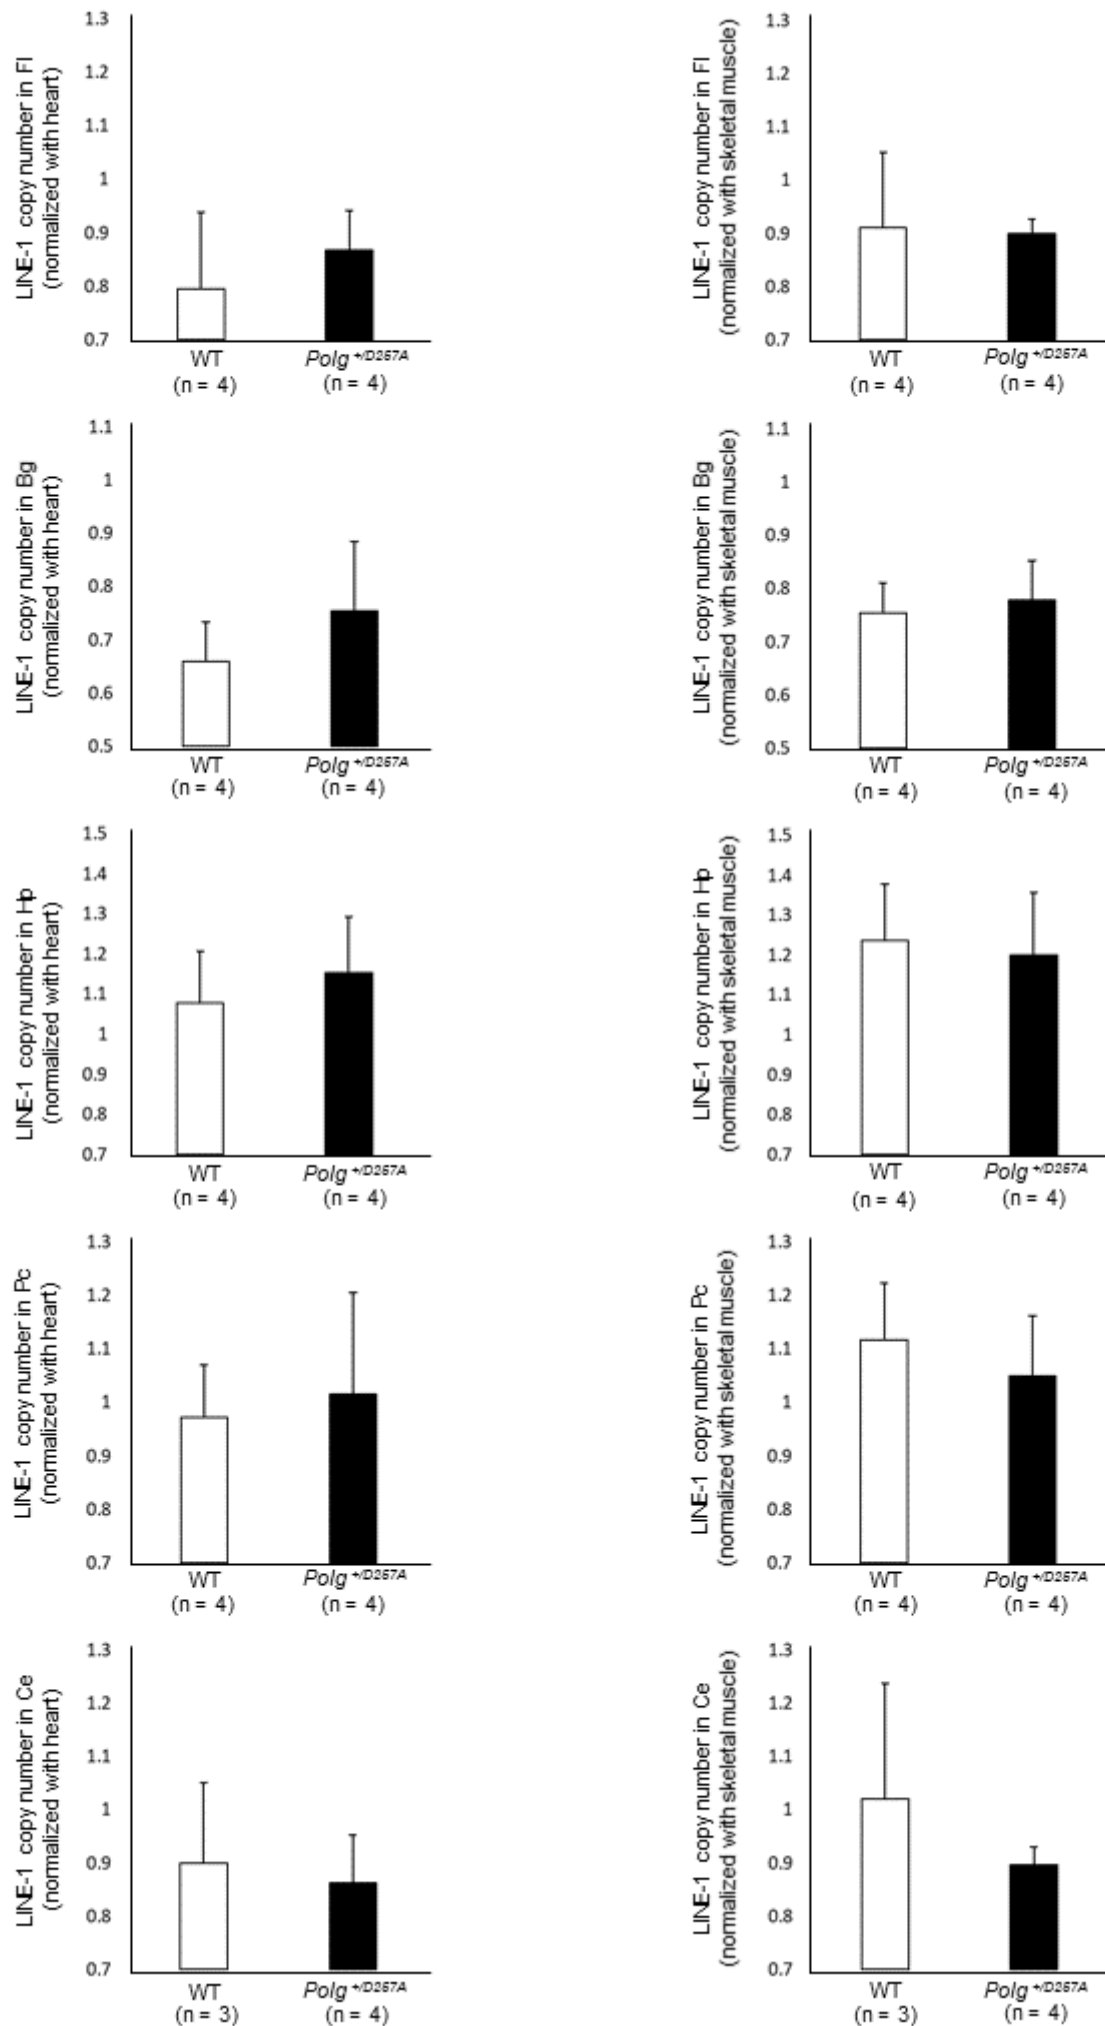

# (G) Gfl\_5UTR-ORF1

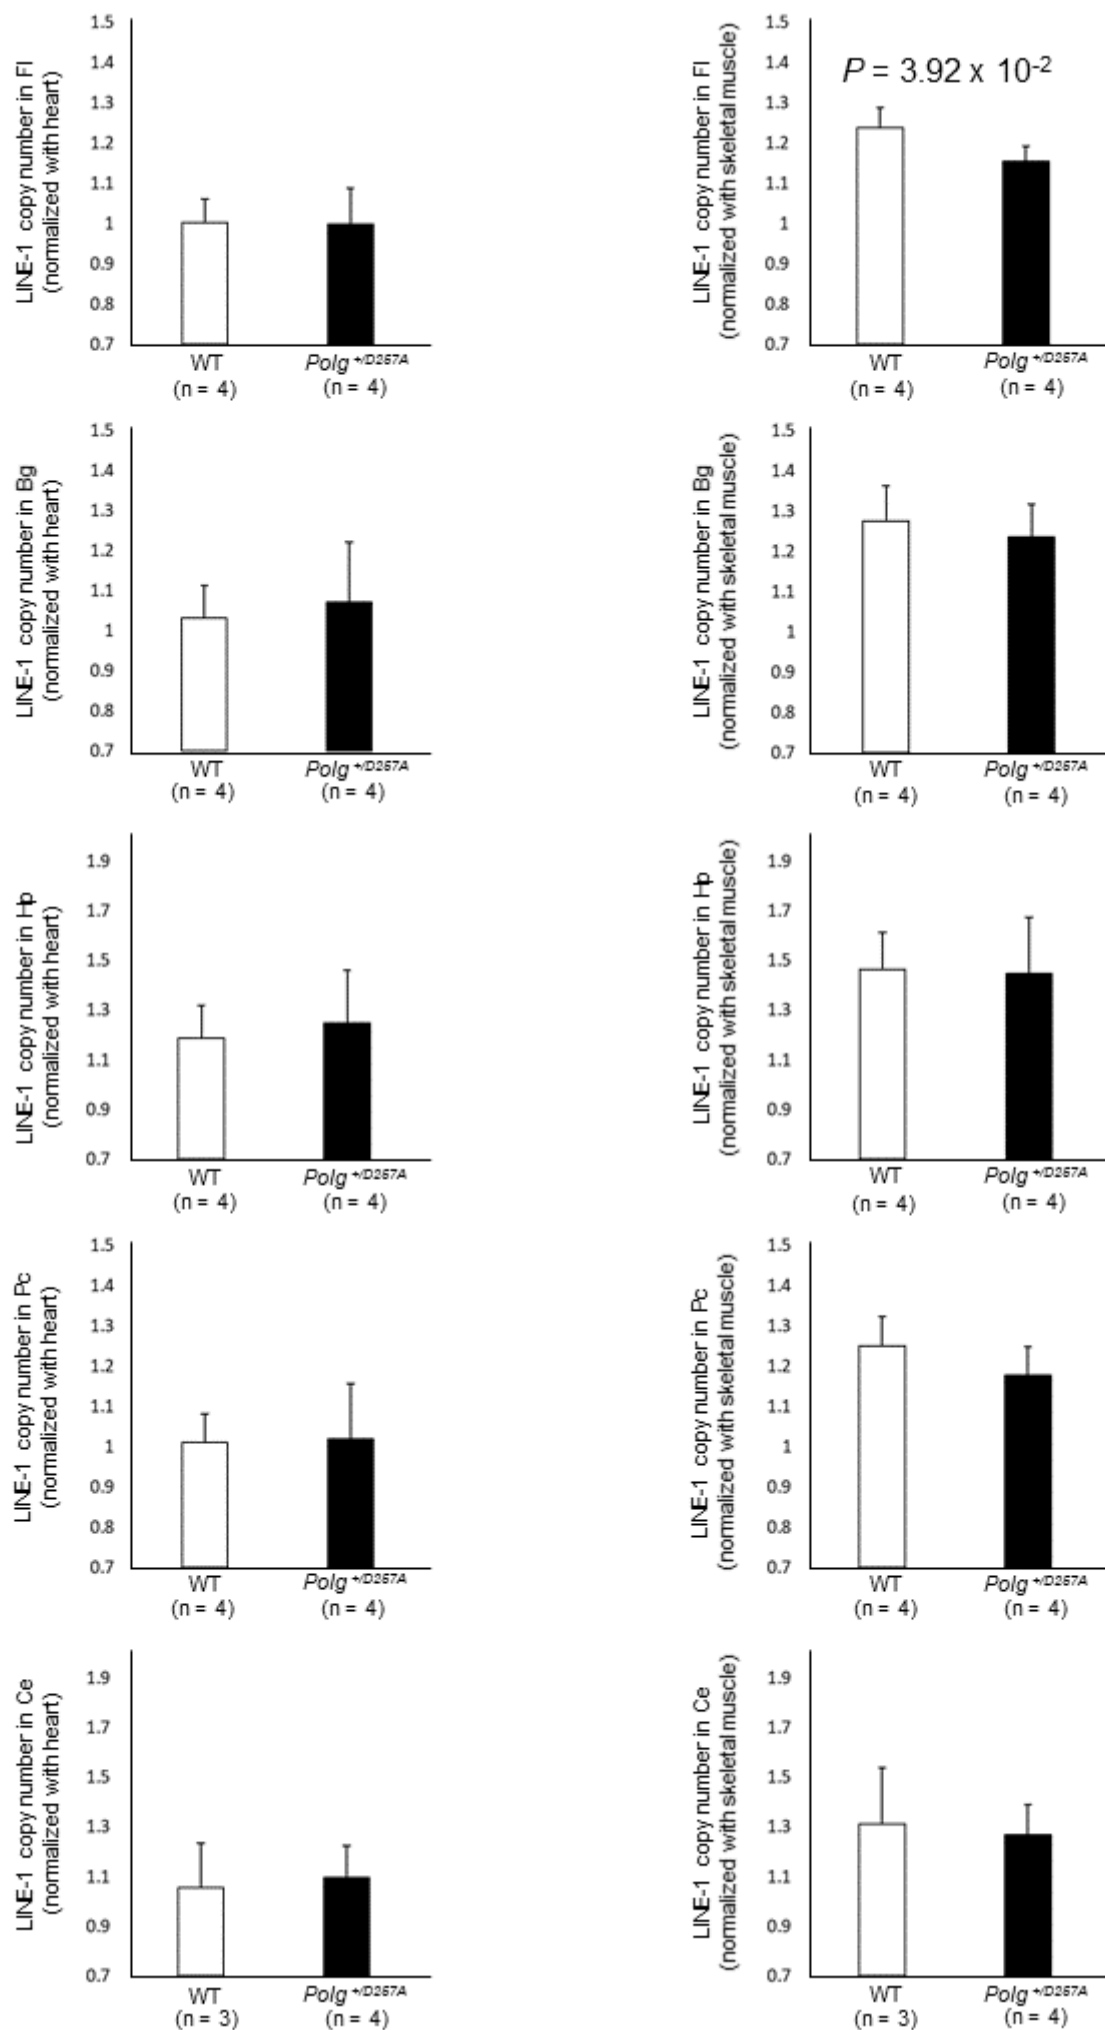

(H) Gfil\_ORF2

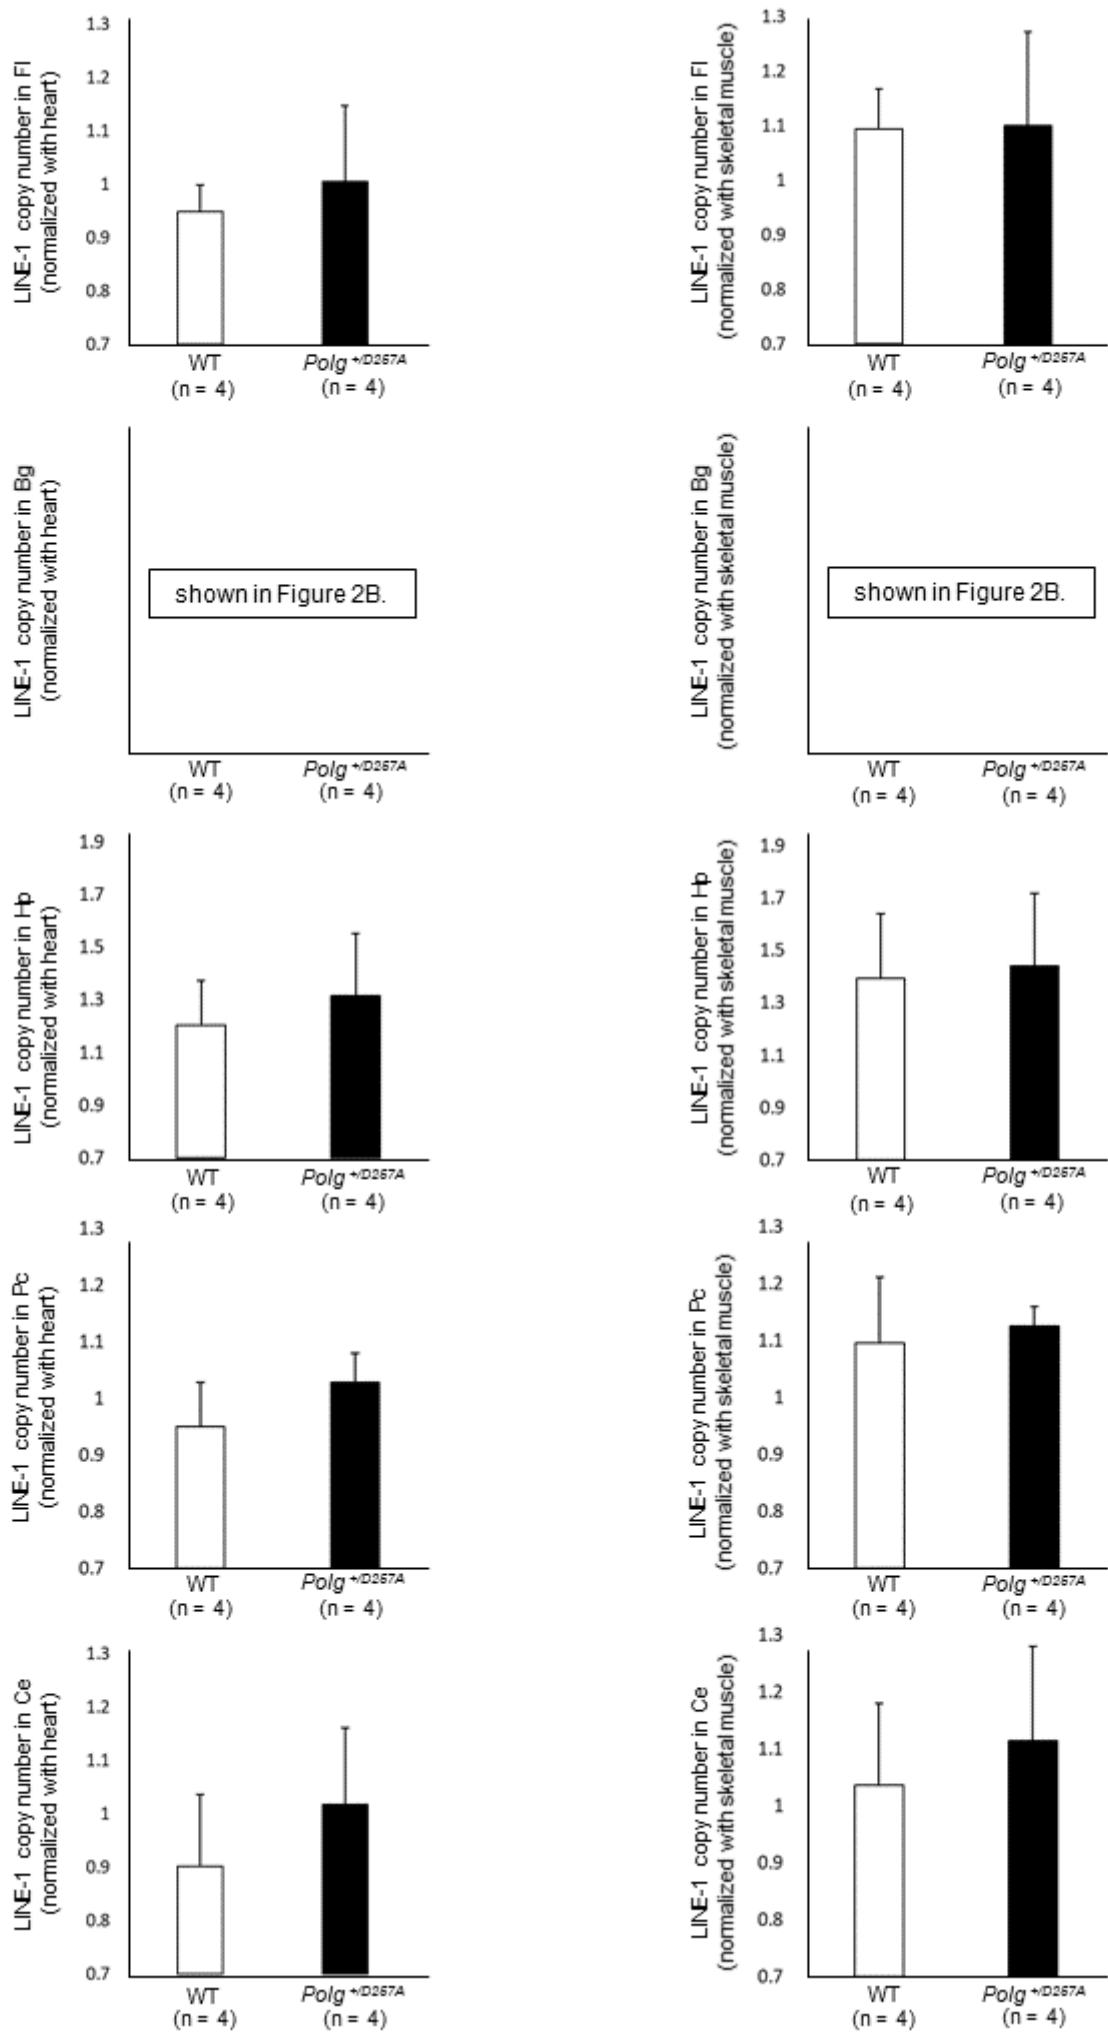

# (I) Tfil\_3UTR

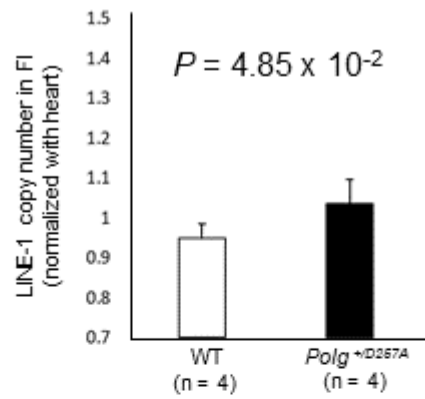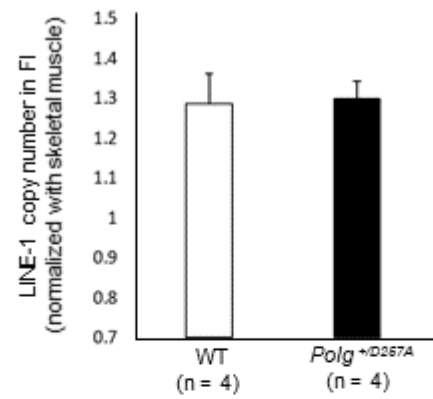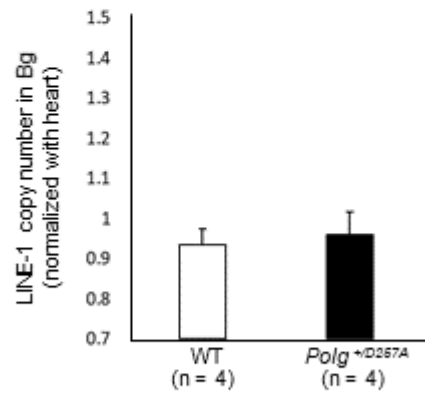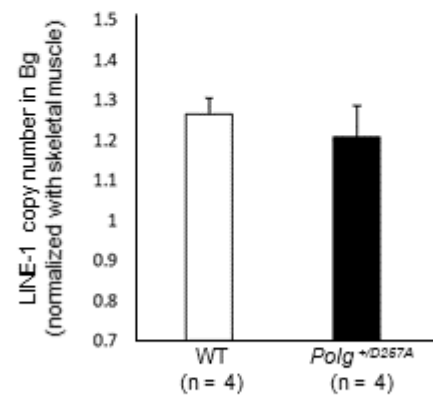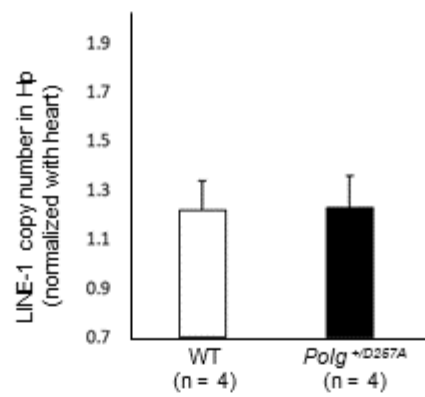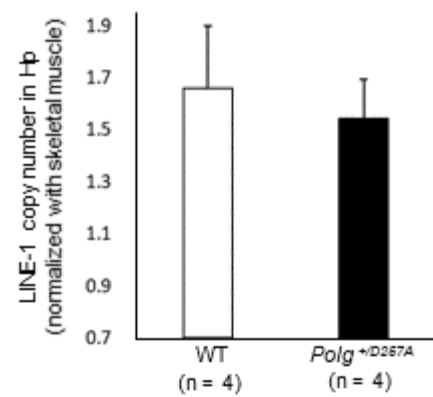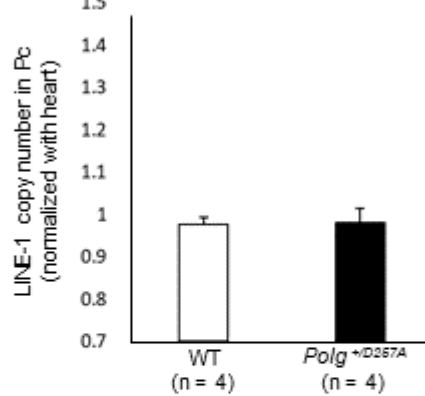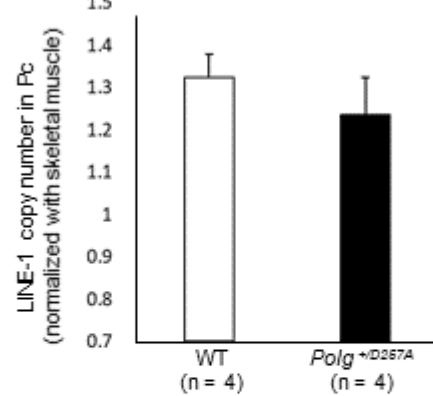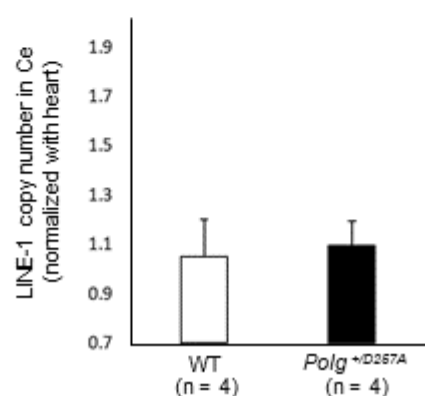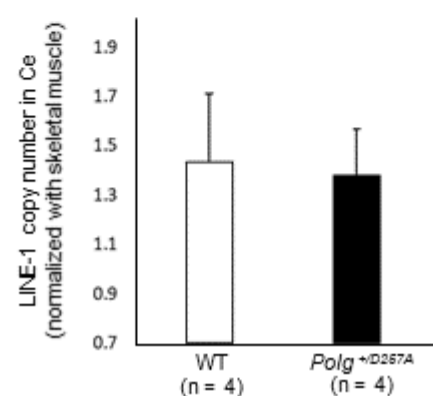

**Figure S3.** LINE-1 copy number detected in 84-week-old *Polg*<sup>+/D257A</sup> mouse brain. The copy number in the brain was normalized to the heart or skeletal muscle. Data are represented as the mean  $\pm$  standard deviation. Significant change in Welch's t test is denoted in its p value (others show no significance).

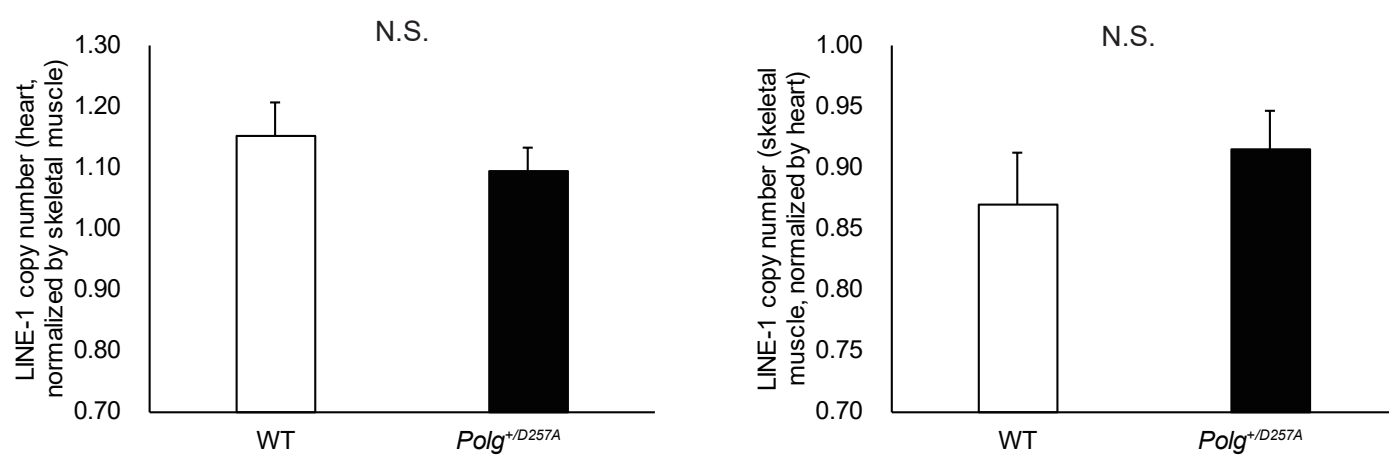

**Figure S4.** Comparison of LINE-1 contents in heart normalized by skeletal muscle and vice versa. Data of Gfll\_ORF1 is shown. Data are represented as the mean  $\pm$  standard deviation. N.S.; not significant in Welch's t test ( $P > 0.05$ ), WT; wild-type mice.
